# Supplementary material for: Identification of mumps virus protein and lipid composition by mass spectrometry
Source: Springer Nature journal article supplement (doi:10.1186/s12985-016-0463-0), 2016-01-14
Supplement: MOESM1 [file 9770518]

**Identification of mumps virus protein and lipid composition by mass  
spectrometry**

Marija Brgles<sup>a,b\*</sup>, Maximilian Bonta<sup>c</sup>, Maja Šantak<sup>a,b</sup>, Maja Jagušić<sup>a,b</sup>, Dubravko Forčić<sup>a,b</sup>,  
Beata Halassy<sup>a,b</sup>, Günter Allmaier<sup>c</sup>, Martina Marchetti-Deschmann<sup>c</sup>

<sup>a</sup>University of Zagreb, Centre for Research and Knowledge Transfer in Biotechnology,  
Rockefellerova 10, HR-10000 Zagreb, Croatia

<sup>b</sup>Centre of Excellence for Viral Immunology and Vaccines, CERVirVac, Croatia

<sup>c</sup>Vienna University of Technology, Institute of Chemical Technologies and Analytics, A-1060  
Vienna, Austria

\*corresponding author

Dr. Marija Brgles

Centre for Research and Knowledge Transfer in Biotechnology, University of Zagreb

Rockefellerova 10, HR-10000 Zagreb, Croatia

Tel: +385 1 6414 313; Fax: +385 1 6414 103

e-mail: [mbrgles@gmail.com](mailto:mbrgles@gmail.com)

**Table S1.** Identification of protein bands shown in Figs. 1 & 2.

| Fig. | protein                         | NCBI sequence number <sup>1</sup> | Identification | PMF              | sequence (PSD)                                                                                                                                                    |
|------|---------------------------------|-----------------------------------|----------------|------------------|-------------------------------------------------------------------------------------------------------------------------------------------------------------------|
| 1    | HN (128kD)                      | 55775571                          | MS/MS          |                  | SYFPSYFSNR<br>SYFPSYFSNRR<br>EFFRPVNPYNPCSGPQQQLDQR                                                                                                               |
|      | HN (64 kD)                      | 55775571                          | MS/MS          |                  | SYFPSYFSNR                                                                                                                                                        |
|      | NP                              | 55775564                          | MS/MS          |                  | FTIEQELQDRGEEGSIPPETLK<br>VFVINTPNPTTR<br>VGALITLFLPSAGMQNHIR<br>CEIDGFEPGTYSR + ammonia loss (N-term C)<br>YMLQPEAQR<br>VADDLGLTPEQR<br>TEVTQLVDR<br>IGGMEHQDLLR |
|      | NP                              | 55775564                          | MS/MS          |                  | VGALITLFLPSAGMQNHIR<br>CEIDGFEPGTYSR + ammonia loss (N-term C)                                                                                                    |
|      | NP                              | 55775564                          | MS/MS          |                  | YMLQPEAQR                                                                                                                                                         |
|      | P                               | 55775566                          | MS/MS          |                  | TSTPVTEFKR<br>MINRFVEKPR<br>GGPGTAPQGGTIQEEGIDGNGALAGSKER                                                                                                         |
|      | M                               | 55775568                          |                |                  | AGSQIKIPLPKPPSDSQR + Acetyl (N-term)<br>ILSGDPSDQQITFVNTYGFIR<br>KILSGDPSDQQITFVNTYGFIR                                                                           |
| 3a   | Mixture: fibronectin, L protein | 544477499<br>55775572             | PMF            | 11.6 %<br>10.0 % |                                                                                                                                                                   |
|      | L protein                       | 55775572                          | PMF, MS/MS     | 14.3 %           | YQVIIPFAR<br>ILPILQAYDLR<br>LTAYPSNLFYLSR<br>NFAPLPTQFIESVPYR<br>VNLTLEQLQSLTPLTSANLVHR                                                                           |
|      | clathrin                        | 4758012                           | PMF, MS/MS     | 15.9 %           | LLYNNVSNFGR<br>LASTLVHLGEYQAAVDGAR                                                                                                                                |
|      | HN                              | 55775571                          | MS/MS          |                  | SYFPSYFSNR<br>EFFRPVNPYNPCSGPQQQLDQR                                                                                                                              |
|      | HN <sup>2</sup>                 | 55775571                          | MS/MS          |                  | SYFPSYFSNR<br>SYFPSYFSNRR<br>EFFRPVNPYNPCSGPQQQLDQR                                                                                                               |
|      | NP                              | 55775564                          | PMF, MS/MS     | 44.6 %           | VADDLGLTPEQR<br>VFVINTPNPTTR<br>CEIDGFEPGTYSR + ammonia loss (N-term C)<br>FTIEQELQDRGEEGSIPPETLK                                                                 |

|    |                                  |                                  |                  |           |                                                                                                                                            |
|----|----------------------------------|----------------------------------|------------------|-----------|--------------------------------------------------------------------------------------------------------------------------------------------|
|    | P                                | 55775567<br>55775567<br>46254662 | PMF, MS/MS       | 27.9<br>% | TSTPVTEFKR<br>ATIIPGVAPVLIGNPEQK<br>GGPGTAPQGQTIQEEGIDGNGALAGSKER                                                                          |
|    | NP                               | 55775564                         | PMF, MS/MS       | 22.6<br>% | VFVINTPNPTTR                                                                                                                               |
|    | M                                | 55775568                         | PMF, MS/MS       | 55 %      | GVSWSPPFRK<br>IPLPKPPDSDSQR<br>KTASDKEQILFEINR<br>AGSQIKIPLPKPPDSDSQR + Acetyl (N-term)<br>ILSGDPSDQQITFVNTYGFIR<br>KILSGDPSDQQITFVNTYGFIR |
|    | V                                | 55775565                         | MS/MS            |           | NIQYPTASHQGSK<br>ATIIPGVAPVLIGNPEQK                                                                                                        |
|    | histone                          | 301792130                        | PMF              | 36.1<br>% |                                                                                                                                            |
|    |                                  |                                  |                  |           |                                                                                                                                            |
| 3b | NP                               | 55775564                         | PMF              | 22.0<br>% |                                                                                                                                            |
|    | fibronectin                      | 544477499                        | PMF              | 19.6<br>% |                                                                                                                                            |
|    | L protein                        | 55775572                         | PMF              | 17.0<br>% |                                                                                                                                            |
|    | clathrin                         | 149053757                        | PMF              | 14.9<br>% |                                                                                                                                            |
|    | HN <sup>2</sup>                  | 55775571                         | PMF              | 5.7 %     |                                                                                                                                            |
|    | HN <sup>2</sup>                  | 55775571                         | PMF              | 5.7 %     |                                                                                                                                            |
|    | NP <sup>4</sup>                  | 55775564                         | PMF              | 35.5<br>% |                                                                                                                                            |
|    | NP <sup>4</sup>                  | 55775564                         | PMF              | 38.8<br>% |                                                                                                                                            |
|    | NP <sup>4</sup> + P <sup>5</sup> | 55775564                         | PMF              | 29.5<br>% |                                                                                                                                            |
|    | actin                            | 40744574                         | PMF              | 39.0<br>% |                                                                                                                                            |
|    | M                                | 55775568                         | PMF              | 27.5<br>% | KTASDKEQILFEINR                                                                                                                            |
|    | V                                | 55775565                         | PMF <sup>4</sup> |           |                                                                                                                                            |
|    | histone                          | 545554686                        | PMF              | 50.0<br>% |                                                                                                                                            |
|    | histone                          | 470363484                        | PMF              | 60.0<br>% |                                                                                                                                            |
|    | histone                          | 449282347                        | PMF              | 87.0<br>% |                                                                                                                                            |

<sup>1</sup>in the case of multiple gi numbers corresponding to the same peptide sequence, the one from mumps L-Zagreb is written

<sup>2</sup>NP peptide *m/z* 2516.25 present

<sup>3</sup>full list of peptides is given in Table S2 of this supplement

<sup>4</sup>full list of peptides is given in Table S3 of this supplement

<sup>5</sup>by similarity with PMF Fig. 3a

**Table S2.** List of peptides found in spectra corresponding to NP bands shown in Fig. 1 and possible matching NP and P peptides.

| nucleoprotein CEF |         |         | nucleoprotein amino acid sequence | MS/MS confirmed | phosphoprotein amino acid sequence |
|-------------------|---------|---------|-----------------------------------|-----------------|------------------------------------|
| 61 kD             | 55 kD   | 48 kD   |                                   |                 |                                    |
| 904.43            | 904.43  |         |                                   |                 |                                    |
| 913.52            | 913.46  | 913.34  | 298-304                           |                 |                                    |
| 921.45            | 921.45  |         | 462-469                           |                 |                                    |
| 929.48            | 929.48  | 929.3   | 298-304, 1 ox                     | 94-101          |                                    |
| 961.52            | 961.52  | 961.39  | 58-65                             |                 |                                    |
| 1061.62           | 1060.62 | 1060.43 | 392-400                           | 392-400         |                                    |
|                   |         | 1062.43 |                                   |                 |                                    |
| 1125.61           | 1125.61 | 1125.47 | 196-204                           |                 |                                    |
| 1135.61           | 1135.61 | 1135.47 | 209-217                           | 209-217         |                                    |
| 1151.59           | 1151.59 | 1151.39 | 209-217, 1 ox                     |                 |                                    |
|                   |         | 1165.54 |                                   |                 | 145-154                            |
| 1244.63           | 1244.63 | 1244.5  | 49-57                             |                 |                                    |
| 1248.69           | 1248.67 | 1248.53 | 199-208                           |                 |                                    |
| 1268.65           | 1268.65 |         | 503-513                           | 503-513         |                                    |
| 1278.63           | 1278.7  | 1278.56 | 296-304, 1 ox, 1 phospho          |                 |                                    |
|                   |         | 1289.57 |                                   |                 | 135-144                            |
|                   |         | 1305.54 |                                   |                 | 135-144, 1 ox, 1 deamidation       |
|                   |         | 1310.45 |                                   |                 |                                    |
| 1313.7            | 1313.74 | 1313.52 | 380-391                           | 380-391         |                                    |
|                   |         | 1351.48 |                                   |                 |                                    |
| 1358.73           | 1358.81 | 1358.59 | 11-20, 1 phospho                  | 37-48           |                                    |
| 1381.77           | 1381.77 | 1381.63 | 231-241                           |                 |                                    |
| 1384.70           | 1384.78 | 1384.56 | 90-101                            |                 |                                    |
| 1396.63           | 1396.68 |         | 514-525                           |                 |                                    |
| 1426.65           | 1426.65 | 1426.43 |                                   |                 |                                    |
|                   |         | 1430.52 |                                   |                 |                                    |
| 1443.66           | 1443.66 | 1443.47 | 102-113                           | 102-113         |                                    |
|                   |         | 1492.41 | 58-69, 1 phospho, 1 deamidated    |                 | 373-384, 2 phospho                 |
| 1537.84           | 1537.88 | 1537.65 | 231-242                           |                 |                                    |
|                   |         | 1556.70 |                                   |                 |                                    |
| 1594.78           | 1594.88 | 1594.63 |                                   |                 |                                    |
| 1698.68           | 1698.76 | 1698.52 | 181-195                           |                 |                                    |
|                   |         | 1725.58 |                                   |                 | 275-290                            |
| 1743.94           | 1744.02 | 1743.78 | 33-48                             |                 |                                    |
|                   | 1766.82 |         |                                   |                 |                                    |
|                   |         | 1791.66 |                                   |                 |                                    |

|         |         |         |                                        |       |       |                                  |
|---------|---------|---------|----------------------------------------|-------|-------|----------------------------------|
|         |         | 1816.77 | 298-311, 2 ox, 2 phospho               |       |       |                                  |
|         |         | 1865.72 |                                        |       |       | 275-291                          |
| 1874.88 | 1874.88 |         | 181-195, 1 ox, 2 phospho               |       |       |                                  |
|         |         | 1878.74 |                                        |       |       |                                  |
|         |         | 1881.73 | 21-36, 3 phospho                       |       |       | 275-291, 1 ox, 1 deamidated      |
|         |         | 1927.63 |                                        |       |       |                                  |
| 1947.84 | 1947.05 |         | 209-224, 1 ox                          |       |       |                                  |
|         |         | 2024.74 |                                        |       |       |                                  |
| 2077.01 | 2076.12 | 2075.84 |                                        |       |       |                                  |
| 2092.83 | 2092.85 | 2092.74 |                                        |       |       |                                  |
|         |         |         | 243-259, 1 deamidated, 3 phospho       | 70-89 | 70-89 |                                  |
| 2125.05 | 2125.18 | 2124.87 | 243-259, 1 deamidated, 1 ox, 3 phospho |       |       |                                  |
| 2141.06 | 2141.20 | 2140.79 |                                        |       |       |                                  |
| 2210.99 | 2211.17 | 2210.80 | 281-297, 4 phospho                     |       |       |                                  |
|         | 2224.16 |         |                                        |       |       |                                  |
| 2282.98 | 2283.17 | 2282.86 |                                        |       |       |                                  |
|         |         |         |                                        | 380-  |       |                                  |
| 2355.07 | 2355.22 | 2354.79 | 94-113, 1 deamidated                   | 400   |       |                                  |
| 2368.05 | 2368.19 | 2367.87 |                                        |       |       |                                  |
|         | 2371.15 | 2370.82 |                                        |       |       |                                  |
| 2498.98 | 2499.18 | 2498.91 |                                        |       |       |                                  |
|         |         |         | 260-280, 1 deamidated, 2 phospho       |       |       |                                  |
|         |         | 2510.91 | 380-400, 1 deamidated, 2 phospho       | 11-32 | 11-32 |                                  |
| 2516.24 | 2516.29 | 2515.85 | 66-89                                  |       |       |                                  |
| 2576.28 | 2576.38 | 2575.92 |                                        |       |       |                                  |
|         | 2590.30 | 2589.90 | 260-280, 3 phospho, 1 deamidated       |       |       |                                  |
| 2643.10 | 2643.31 | 2642.87 | 349-370                                |       |       |                                  |
| 2654.97 |         |         | 526-549                                |       |       |                                  |
|         |         | 2795.02 |                                        |       |       | 155-183, 2 deamidated, 1 phospho |
|         |         |         | 503-525, 3 deamidated, 2 phospho       |       |       |                                  |
| 2809.31 | 2809.41 |         | 37-57, 1 ox, 3 phospho                 |       |       |                                  |
|         | 2843.24 |         |                                        |       |       |                                  |
|         | 2849.44 |         |                                        |       |       |                                  |
|         | 2875.37 |         |                                        |       |       |                                  |

|                 |         |  |  |  |
|-----------------|---------|--|--|--|
|                 | 2891.45 |  |  |  |
| 2901.31         | 2901.42 |  |  |  |
|                 | 3019.53 |  |  |  |
| <i>3359.77*</i> |         |  |  |  |
| <i>3825.75</i>  |         |  |  |  |
| <i>3852.12</i>  |         |  |  |  |

\*italicized, grey numbers denote unresolved peaks

**Table S3.** List of peptides found in spectra corresponding to NP bands shown in Fig. 2 and possible matching NP and P peptides.

| nucleoprotein Vero |         |          | nucleoprotein amino acid sequence      | phosphoprotein amino acid sequence |
|--------------------|---------|----------|----------------------------------------|------------------------------------|
| 61 kD              | 55 kD   | 48 kD    |                                        |                                    |
| 921.56             | 921.56  |          | 462-469                                |                                    |
| 961.65             | 961.65  |          | 58-65                                  |                                    |
|                    |         | 1039.77  |                                        |                                    |
| 1060.72            | 1060.73 | 1060.77  | 392-400                                |                                    |
| 1087.73            | 1087.72 |          |                                        |                                    |
|                    |         | 1095.82  |                                        |                                    |
| 1117.75            |         |          |                                        |                                    |
| 1135.73            | 1135.74 | 1135.76  | 209-217                                |                                    |
|                    |         | 1143.84  |                                        |                                    |
|                    |         | 1181.80  |                                        |                                    |
|                    | 1189.80 |          |                                        |                                    |
| 1196.77            | 1196.78 | 1196.83  | 250-259, 1 phospho                     |                                    |
| 1220.83            |         |          | 392-400, 2 phospho                     |                                    |
| 1244.76            | 1244.79 | 1244.82  | 49-57                                  |                                    |
| 1248.82            | 1248.85 | 1248.85  | 199-208                                |                                    |
| 1278.83            | 1278.84 |          | 296-304, 1 ox, 2 phospho               |                                    |
| 1313.87            | 1313.88 | 1313.90  | 380-391                                |                                    |
| 1358.95            | 1358.96 | 1358.97  | 11-20, 1 phospho                       |                                    |
| 1370.90            | 1370.86 | 1370.96  |                                        |                                    |
| 1381.95            | 1381.96 | 1381.98  | 231-241                                |                                    |
| 1384.96            | 1384.91 | 1384.96  | 90-101                                 |                                    |
| 1426.83            | 1426.84 | 1426.87  |                                        |                                    |
| 1443.85            | 1443.85 | 1443.88  | 102-113                                |                                    |
| 1500.87            | 1500.90 | 1500.90  |                                        |                                    |
|                    | 1554.00 |          |                                        |                                    |
|                    |         | 1573.103 |                                        |                                    |
|                    | 1595.10 |          |                                        |                                    |
|                    | 1621.09 | 1621.10  | 205-217, 1 deamidated, 1 ox            |                                    |
|                    | 1625.14 |          | 298-311, 1 deamidated                  |                                    |
|                    | 1702.17 | 1702.18  | 205-217, 1 deamidated, 1 ox, 1 phospho |                                    |
| 1744.26            | 1744.25 |          | 33-48, 1 deamidated                    |                                    |
|                    |         | 1759.23  |                                        |                                    |
|                    |         | 1817.22  | 298-311, 1 deamidated, 2 ox, 2 phospho | 38-55                              |

|         |         |         |                                  |         |
|---------|---------|---------|----------------------------------|---------|
|         |         | 1844.25 |                                  |         |
|         | 1925.31 |         |                                  |         |
|         |         | 1959.31 |                                  |         |
|         | 1988.32 | 1988.32 |                                  |         |
|         | 2019.28 |         |                                  |         |
|         |         | 2026.40 |                                  |         |
| 2077.47 | 2076.44 | 2076.44 |                                  |         |
| 2087.40 | 2087.40 | 2087.40 |                                  |         |
|         |         | 2110.41 |                                  |         |
| 2125.47 | 2125.49 | 2125.49 | 70-89                            |         |
| 2134.49 |         |         |                                  |         |
| 2168.50 | 2168.50 | 2168.50 |                                  |         |
| 2182.49 | 2182.49 | 2182.50 |                                  |         |
| 2212.44 | 2212.45 | 2212.50 | 372-391                          |         |
| 2267.51 |         |         | 102-119, 1 phospho               |         |
|         | 2309.57 | 2309.60 |                                  |         |
| 2354.44 | 2354.50 | 2354.54 | 94-113                           |         |
| 2368.55 | 2368.58 |         |                                  |         |
|         | 2415.58 | 2415.60 |                                  |         |
|         |         | 2472.64 |                                  |         |
| 2499.57 | 2499.65 | 2499.66 |                                  |         |
| 2516.62 | 2516.65 | 2516.67 | 11-32                            |         |
| 2528.75 | 2528.76 | 2528.81 | 0-93, 2 deamidated               |         |
| 2573,64 | 2573.69 | 2573.71 |                                  |         |
|         | 2576.79 |         | 66-89                            |         |
| 2643.67 | 2643.70 | 2643.75 | 349-370                          |         |
| 2655.52 |         |         | 526-549                          |         |
| 2794.72 | 2794.74 |         |                                  |         |
| 2799.79 | 2798.78 | 2798.79 | 349-371                          |         |
| 2809.75 | 2809.78 |         | 503-525, 3 deamidated, 2 phospho |         |
|         |         | 2826.84 | 37-57, 2 deamidated, 3 phospho   | 154-181 |
|         | 2856.85 | 2855.80 |                                  |         |
|         | 2901.99 |         |                                  |         |
|         |         | 3102.88 |                                  |         |
| 3802.44 |         |         |                                  |         |
| 3850.45 |         |         | 470-502                          |         |
| 3859.50 |         |         |                                  |         |
| 3907.50 |         |         |                                  |         |

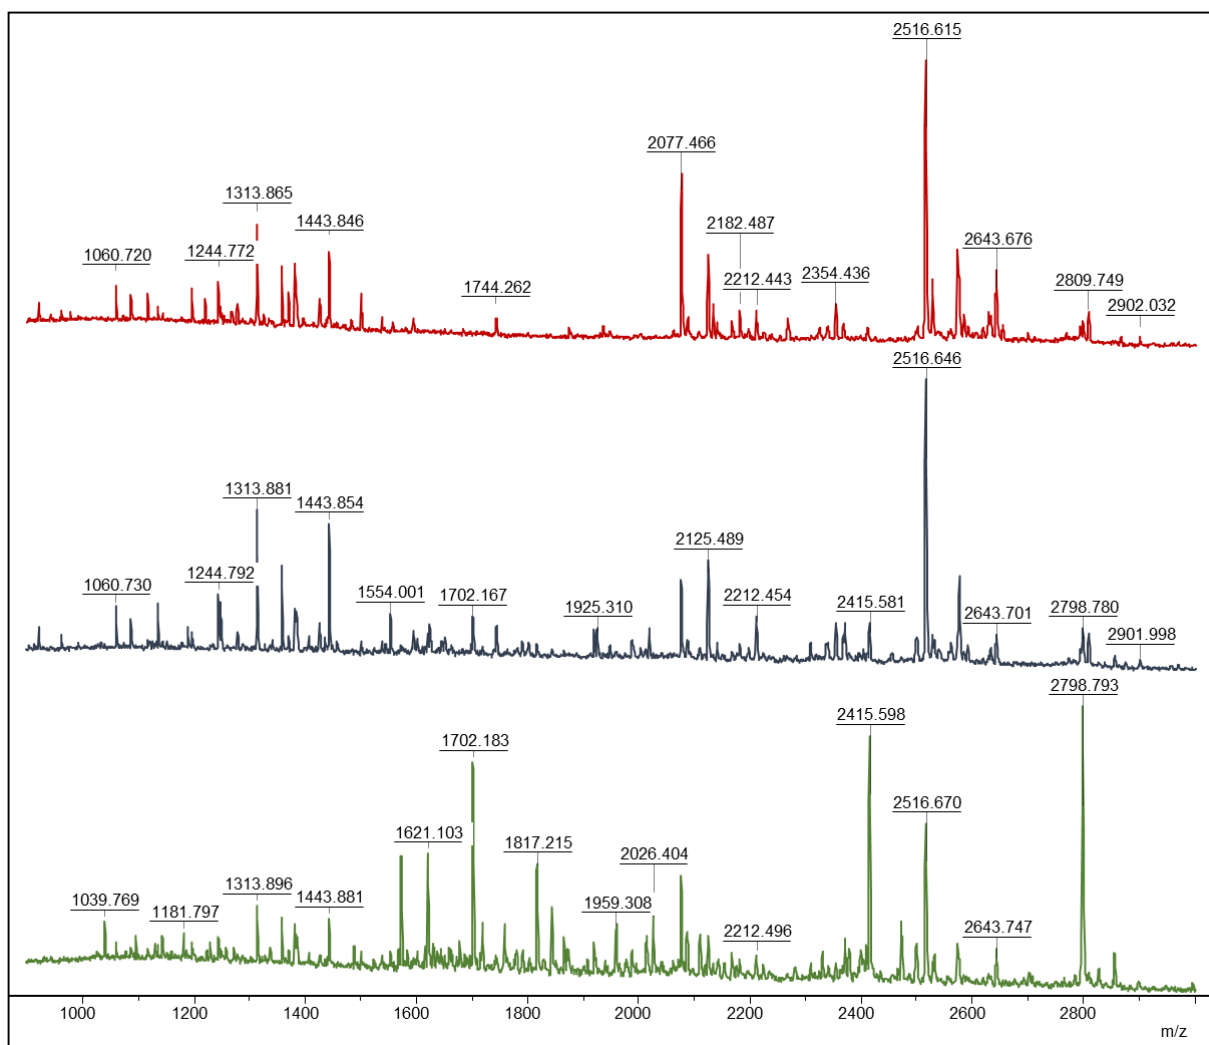

**Figure S1.** Peptide mass fingerprint by means of positive ion MALDI reflectron MS of NP forms (depicted in Fig. 2b, reduced sample). Green (bottom) spectrum – NP apparent molecular weight 48 kDa; blue (middle) spectrum – NP apparent molecular weight 55 kDa; red (top) spectrum – NP apparent molecular weight 61 kDa. Full peptide list is given in Table S3.



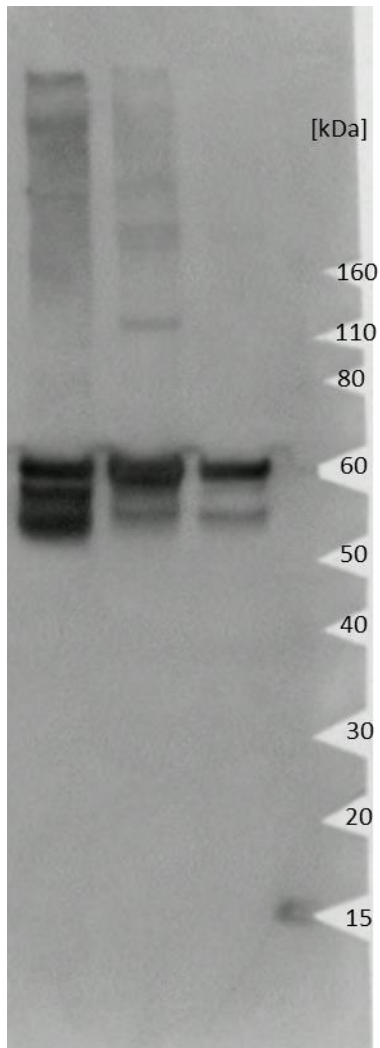

**Figure S2.** Western blot of mumps virus samples; L-Zg/Vero, JL/Vero, JL/CEF (from left to right) subjected to electrophoresis under reducing denaturing conditions detected by anti-mumps serum.
